# Supplementary material for: Development of SSR markers and analysis of diversity in Turkish populations of Brachypodium distachyon
Source: PubMed Central journal article supplement (PMC2719641; doi:10.1186/1471-2229-9-88), 2009-07-13
Supplement: 1471-2229-9-88-S8.pdf [file 1471-2229-9-88-S8.pdf]

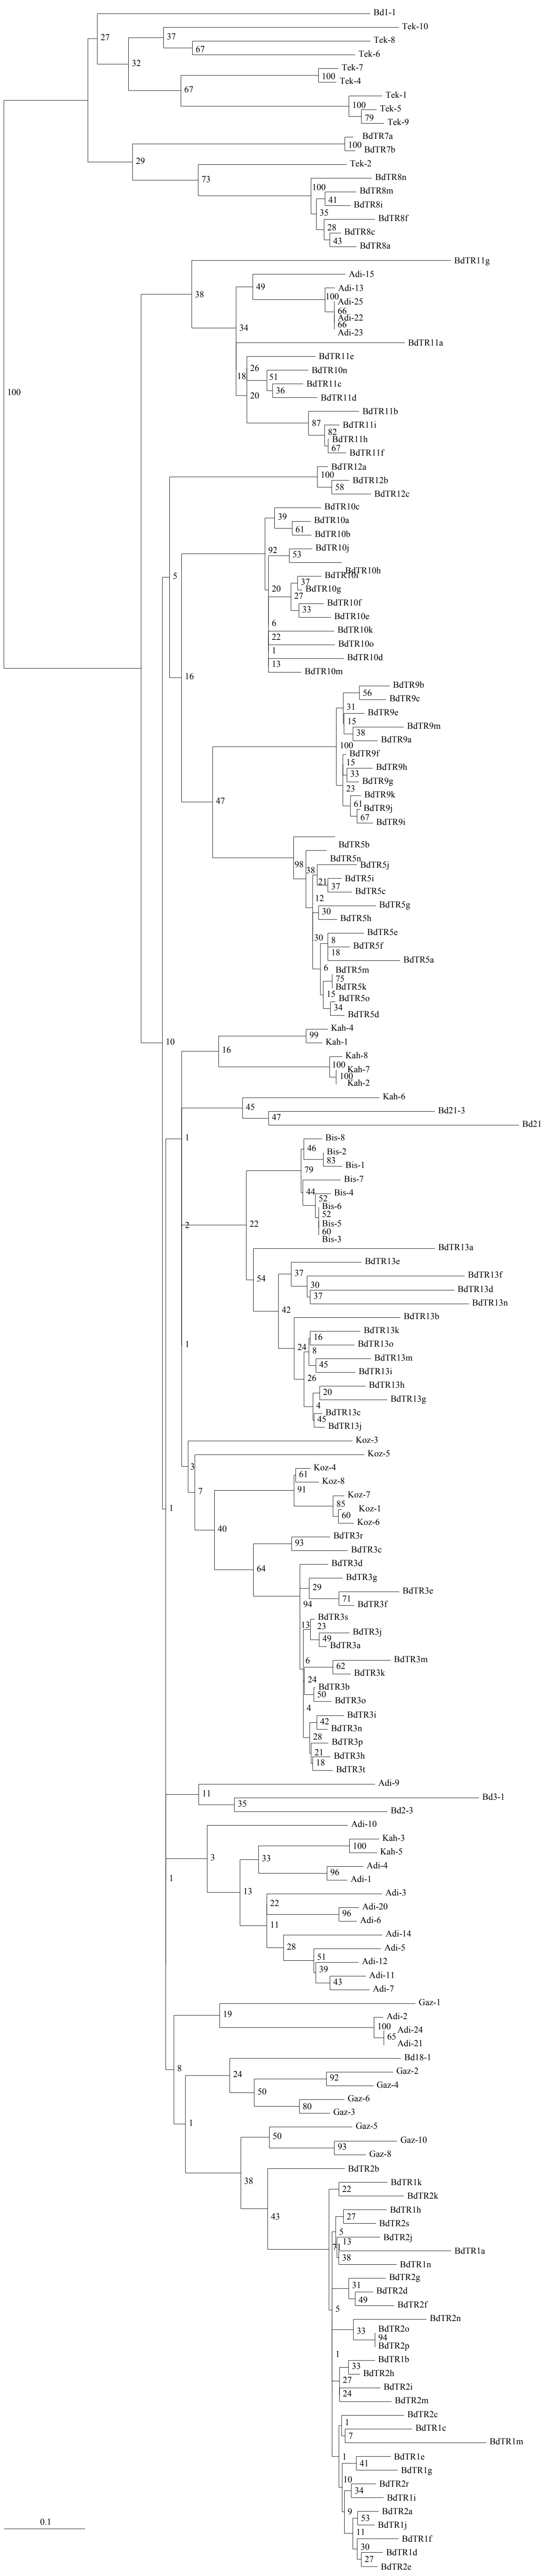

0.1
